# Supplementary material for: The Identification of Small Molecule Inhibitors That Reduce Invasion and Metastasis of Aggressive Cancers
Source: PubMed Central journal article supplement (PMC7915539; doi:10.3390/ijms22041688), 2021-02-08
Supplement: ijms-22-01688-s001.pdf [file ijms-22-01688-s001.pdf]

## Supplementary Materials

**Table S1 Overview of cell lines and cell culture conditions**

| Cell line           |                                         | Medium    | Supplier         | Supplements                                                                                                              |
|---------------------|-----------------------------------------|-----------|------------------|--------------------------------------------------------------------------------------------------------------------------|
| DU145               | ATCC Cat# HTB-81,<br>RRID:CVCL_0105     | RPMI 1640 | Lonza, BE12-167F | 10% FBS, 100 units/ml penicillin,<br>50 µg/ml streptomycin,<br>GlutaMAX                                                  |
| PC-3                | ATCC Cat# CRL-1435,<br>RRID:CVCL_0035   | RPMI 1640 | Lonza, BE12-167F | 10% FBS, 100 units/ml penicillin,<br>50 µg/ml streptomycin,<br>GlutaMAX                                                  |
| MDA-MB-231          | ATCC Cat# CRM-HTB-26,<br>RRID:CVCL_0062 | RPMI 1640 | Lonza, BE12-167F | 10% FBS, 100 units/ml penicillin,<br>50 µg/ml streptomycin,<br>GlutaMAX                                                  |
| MDA-MB-231luc       |                                         | RPMI 1640 | Lonza, BE12-167F | 10% FBS, 100 units/ml penicillin,<br>50 µg/ml streptomycin,<br>GlutaMAX, 800 µg/mL of G-418                              |
| MDA-MB-231/CAGAluc2 |                                         | RPMI 1640 | Lonza, BE12-167F | 0% FBS, 100 units/ml penicillin, 50 µg/ml streptomycin, GlutaMAX, 800 µg/mL of G-418, 0.35 mg/ml hygromycin (Invitrogen) |
| PANC-1              | ATCC Cat# CRL-1469,<br>RRID:CVCL_0480   | RPMI 1640 | Lonza, BE12-167F | 10% FBS, 100 units/ml penicillin,<br>50 µg/ml streptomycin,<br>GlutaMAX                                                  |
| T24                 | ATCC Cat# HTB-4,<br>RRID:CVCL_0554      | RPMI 1640 | Lonza, BE12-167F | 10% FBS, 100 units/ml penicillin,<br>50 µg/ml streptomycin,<br>GlutaMAX                                                  |

|                                               |                                           |                                                     |                                        |                                                                                               |
|-----------------------------------------------|-------------------------------------------|-----------------------------------------------------|----------------------------------------|-----------------------------------------------------------------------------------------------|
| PC-3M-Pro4luc2                                |                                           | Dulbecco's<br>Modified<br>Eagle<br>medium<br>(DMEM) | Life technologies,<br>Gibco, 31966-021 | 10% FCI (Hyclone), 100<br>units/ml penicillin, 50 µg/ml<br>streptomycin<br>800 µg/mL of G-418 |
| PC-3M-Pro4luc<br>(a.k.a. PC-3M-<br>Pro4lucA6) |                                           | Dulbecco's<br>Modified<br>Eagle<br>medium<br>(DMEM) | Life technologies,<br>Gibco, 31966-021 | 10% FCI (Hyclone), 100<br>units/ml penicillin, 50 µg/ml<br>streptomycin<br>800 µg/mL of G-418 |
| UM-UC3luc2                                    | ATCC Cat# CRL-<br>1749,<br>RRID:CVCL_1783 | Eagle's<br>minimal<br>essential<br>medium<br>(EMEM) | ATCC, 30-2003                          | 10% FBS, 100 units/ml<br>penicillin, 50 µg/ml<br>streptomycin<br>800 µg/mL of G-418           |
| T24-pEcad-<br>luc/RIuc                        |                                           | RPMI 1640                                           | Life Technologies<br>Gibco 31870-025   | 10% FCS, L-Glutamine,<br>Zeocin (50 µg/ml)                                                    |
| PC-3-pEcad-<br>luc/RIuc                       |                                           | RPMI 1640                                           | Life Technologies<br>Gibco 31870-025   | 10% FCS, L-Glutamine,<br>Zeocin (50 µg/ml)                                                    |
| 3T3                                           | ATCC Cat# CRL-<br>1658,<br>RRID:CVCL_0594 | Dulbecco's<br>Modified<br>Eagle<br>medium<br>(DMEM) | Life technologies,<br>Gibco, 31966-021 | 10% FCS                                                                                       |

**Table S2 RT-qPCR primer sequences**

| GENE       | Forward Primer         | Reverse Primer           |
|------------|------------------------|--------------------------|
| E-cadherin | TTGACGCCGAGAGCTACAC    | GACCGGTGCAATCTTCAA       |
| N-cadherin | CAGACCGACCCAAACAGCAAC  | GCAGCAACAGTAAGGACAAACATC |
| Vimentin   | CCAAACTTTTCCTCCCTGAACC | CGTGATGCTGAGAAGTTTCGTTGA |
| ZEB1       | CCATATTGAGCTGTTGCCGC   | GCCCTTCCTTTCTGTGTCA      |
| SNAIL1     | ACCACTATGCCGCGCTCTT    | GGTCGTAGGGCTGCTGGAA      |
| GAPDH      | GACAGTCAGCCGCATCTTC    | GCAACAATATCCACTTTACCAGAG |

# A

```

-294          ccac gggtaaaagc cctctctgat
-270 cccaggtctt agtgagccac ggggggggct gggattcgaa
-250 cccagtgga tccagccagc gcaggtccca taaccaccct
-190 agaccctagc aactccaggc tagagggtca ccgctctctt
-150 gagagggcgg gggggggggc agtaagctcc gcctctggga
-110 gggcccccgg ccgctctctt gctctctggc gcaggtggac
-70  cctcagccaa tccagcctac gggggggggc gctccggggc
-30  tcacctggct gcagccacgc acccccctc AGTGCCTCC
11  GAACTCGAAA GCACCTGTGA GCTTCGCGAA GTCA
  
```

**CDH1 (E-cadherin, 16q22.1)**

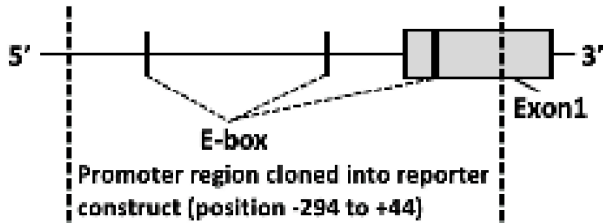

# B

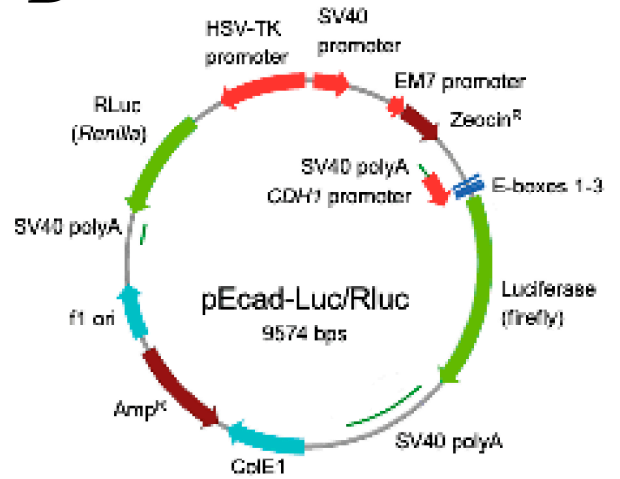

# C

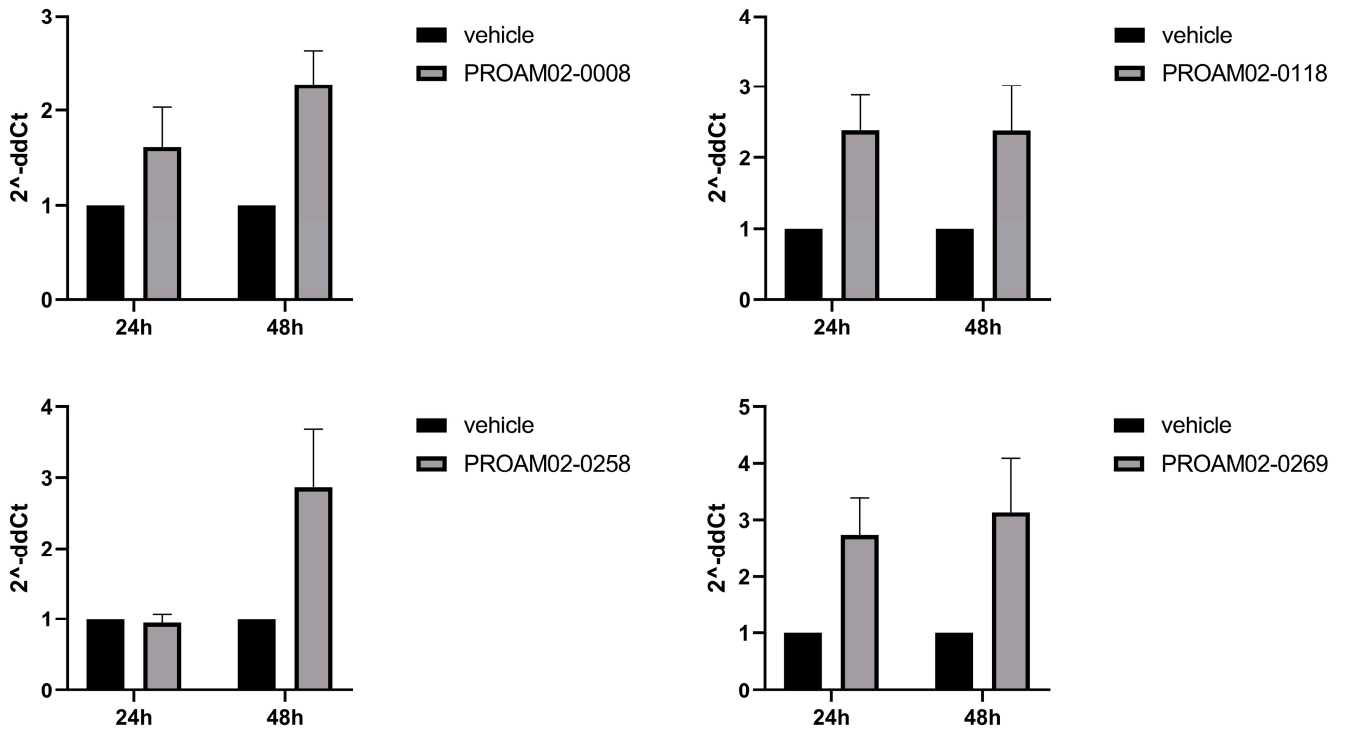

**Figure S1: Schematic presentation of the double reporter construct pEcad-luc/Rluc for the high throughput screening (HTS) assay**

A) and B) The E-cadherin promoter, containing three critical E-boxes, was cloned upstream of the *Firefly* luciferase gene. The viral HSV-Tk promoter was cloned upstream the *Renilla* luciferase gene. Both promoter-luciferase reporter constructs were cloned in opposite orientation to avoid potential interference of transcription.

C) E-cadherin mRNA expression was reduced after treatment of PC-3M-Pro4luc2 cells with 5  $\mu$ M LMW-compound for 24 and 48 hours. Gene expression is displayed as  $2^{-\Delta\Delta Ct}$  values.

**A****Biocoat™ Matrigel®  
Invasion Chambers**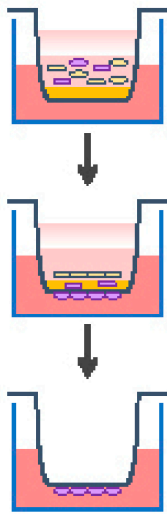**Day -4**

Compound pre-treatment (10 μM)

**Day 0**

Cell suspension seeded in upper chamber

- 40,000 pre-treated cells in presence of compound

- FCS-containing medium as chemo-attractant in lower compartment

**Day 2**

Harvest + read-out

- Removal of non-invaded cells

- Quantification invaded cells (CellTiter-Glo assay)

**B****PC-3**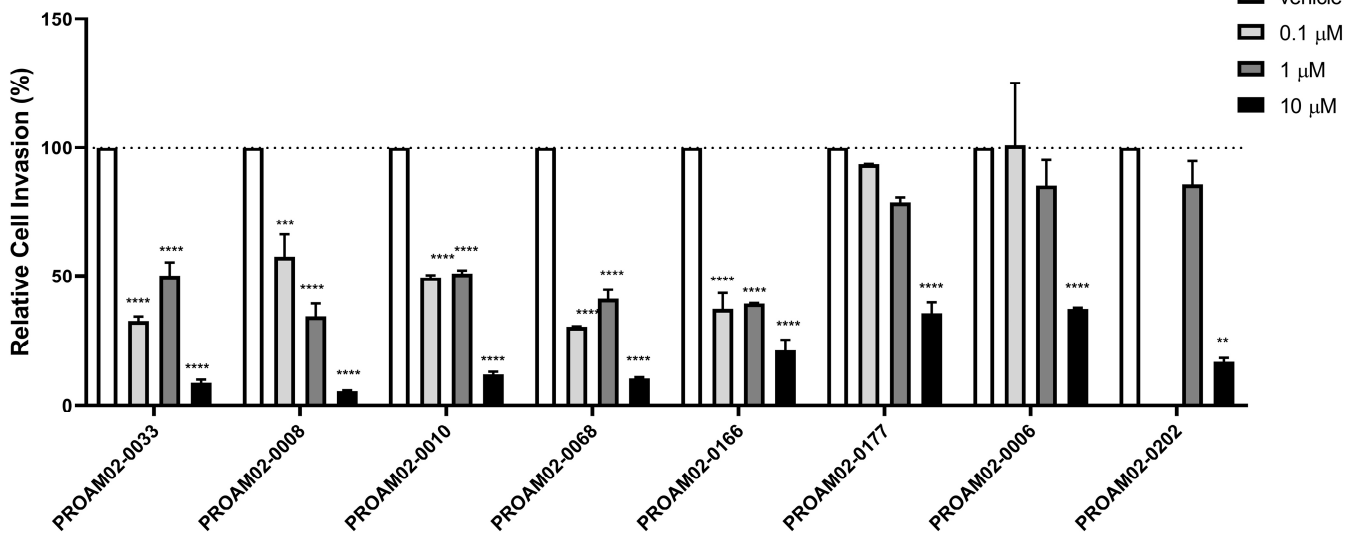**C****PC-3M-Pro4lucA6**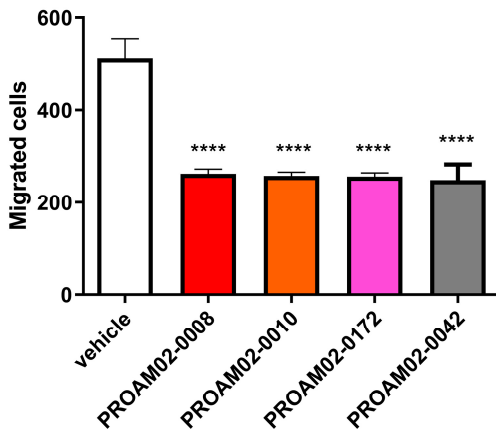

**Figure S2: The dose-dependent effect of the LMW-compounds on prostate cancer invasion *in vitro*.**

A) Schematic overview of the BioCoat Matrigel invasion assay. B) PC-3 cells were treated with a dose ranging from 0.1 to 10  $\mu\text{M}$ . After 2 days, the effect of the LMW-compounds on invasion was measured. (Relative cell invasion  $\pm$ -SEM, two-way ANOVA). \*  $p < 0.05$ , \*\*  $p < 0.01$ , \*\*\*  $p < 0.001$  and \*\*\*\*  $p < 0.0001$  C) The migration of PC-3M-Pro4lucA6 cells was significantly reduced after treatment with 5  $\mu\text{M}$  for 24 hours. Number of migrated cells  $\pm$ -SEM, one-way ANOVA). \*\*\*\*  $p < 0.0001$

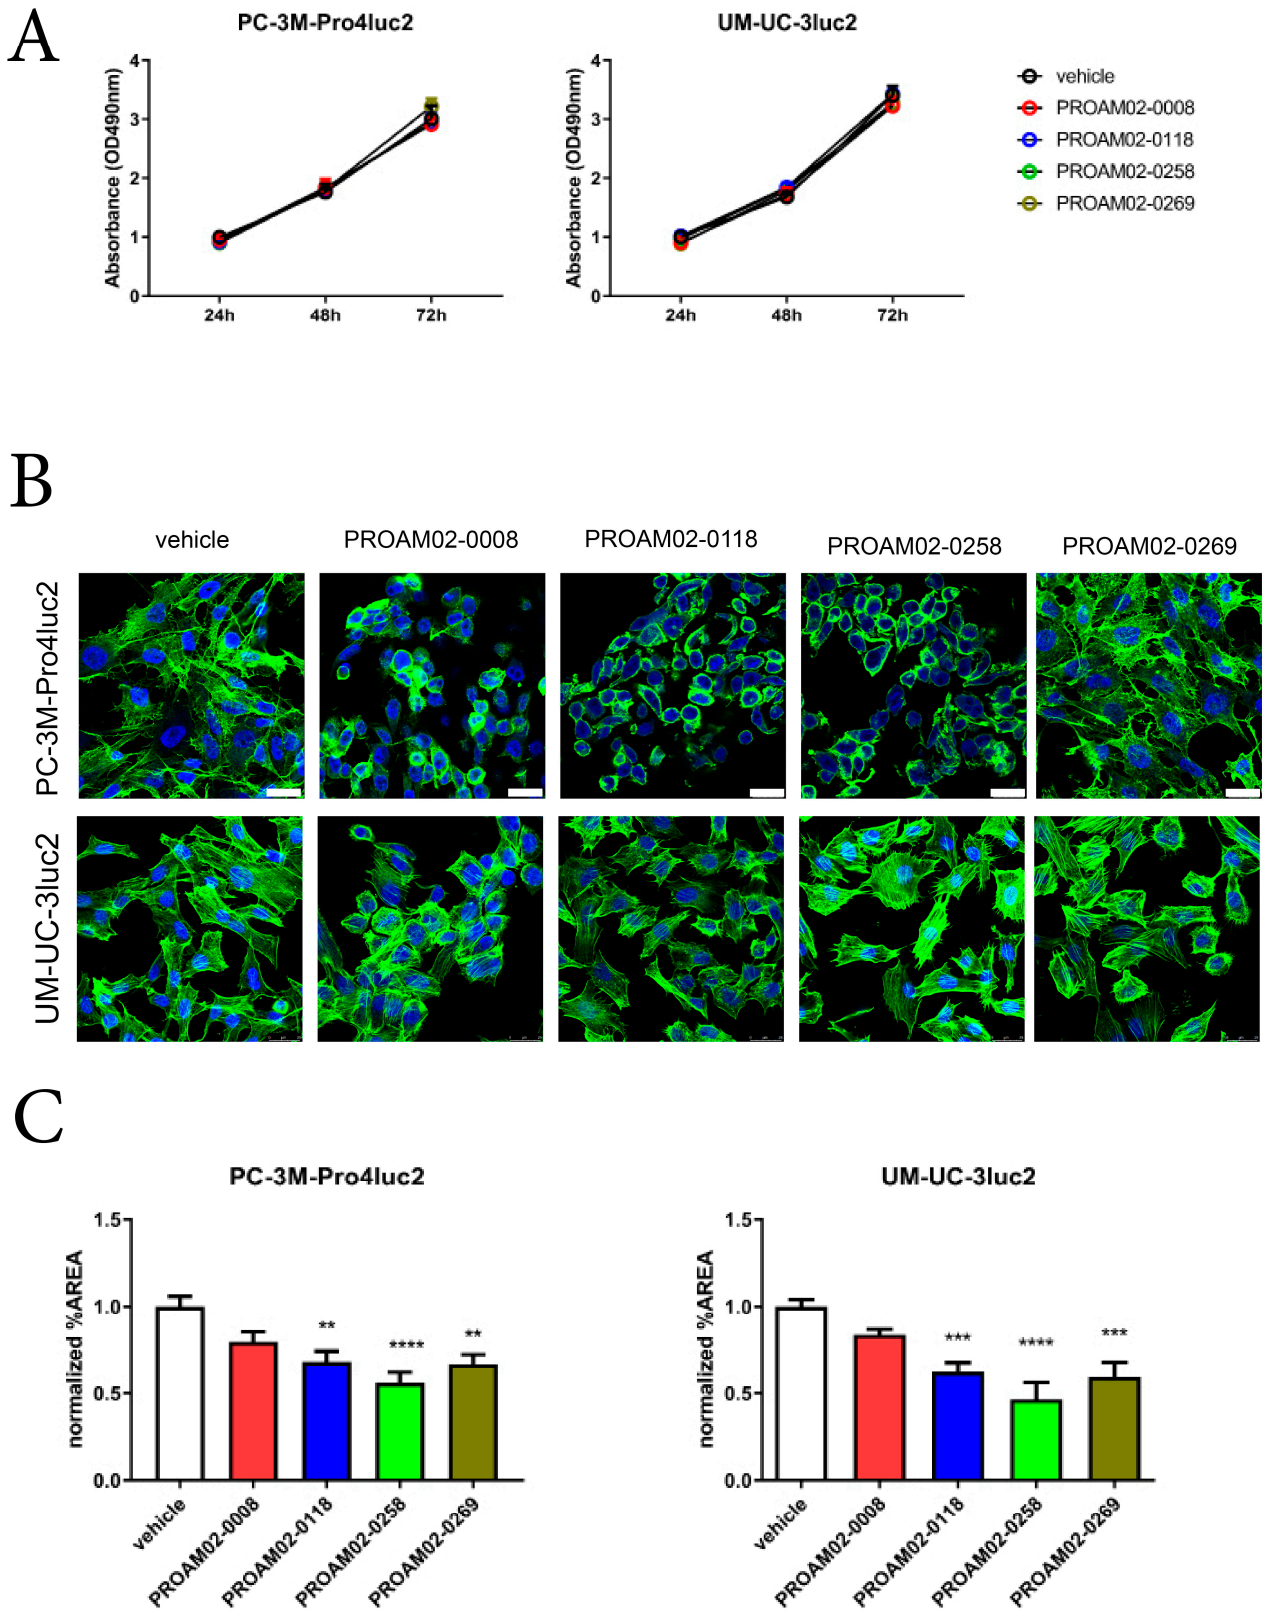

Figure S3: Effects of LMW-compounds on cancer cell proliferation, organization of the actin cytoskeleton and clonogenicity



A) No changes in proliferation were observed after treatment of prostate and bladder cancer cells with 5  $\mu$ M LMW-compound for 72 hours. (N=3, mean +/- SEM, two-way ANOVA)

B) Treatment of human prostate and bladder cancer cells with selected LMW-compounds for 48 hours induced changes in the actin cytoskeleton indicative of a more sessile, epithelial phenotype. (Phalloidin staining =green, DAPI staining =blue, 63x magnification, scalebar = 25  $\mu$ m).

C) Treatment with 5  $\mu$ M of LMW-compounds significantly reduced the clonogenic potential of PC-3M-Pro4luc2 and UM-UC-3luc2. Normalized percentage area colonies was quantified by ImageJ. Representative images are displayed below. \*\* p<0.01, \*\*\* p<0.001 and \*\*\*\* p<0.0001 (N=4, mean +/- SEM, one-way ANOVA)

A

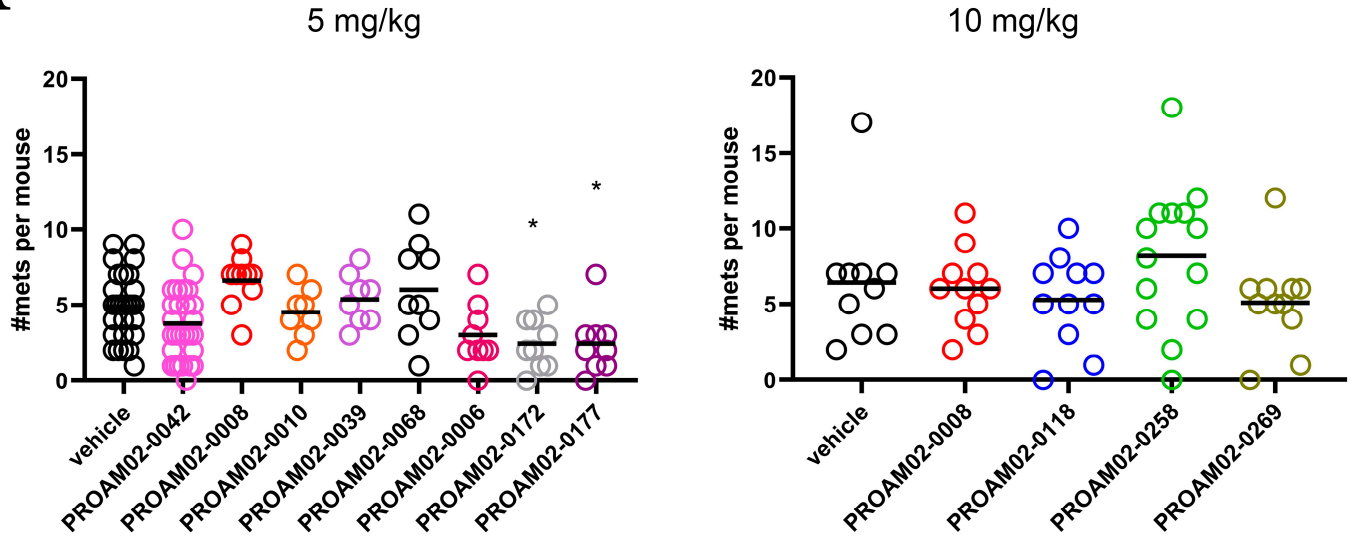

B

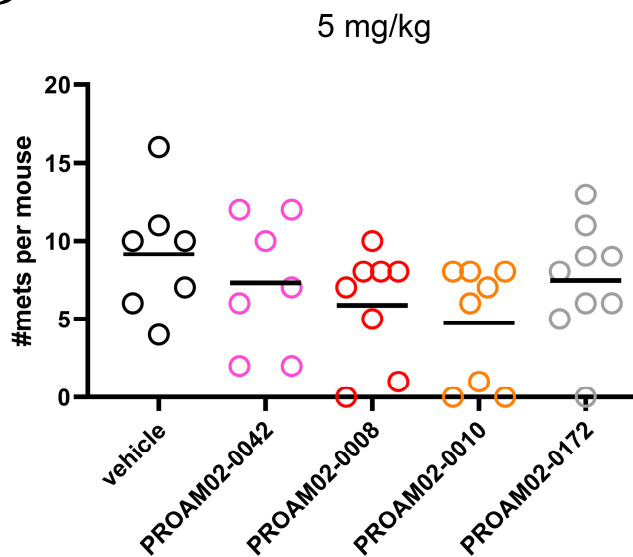

**Figure S4: The effect of LMW-compounds on bone metastasis formation and intrasosseous tumor growth *in vivo***

A) Screening of the effect of selected LMW-compounds on prostate cancer metastasis formation *in vivo*. Human prostate cancer cells PC-3M-Pro4lucA6 were inoculated into the left cardiac ventricle of male mice and treated by daily intraperitoneal administration of selected LMW compounds. The number of skeletal metastases were measured. Treatment with 5 mg/kg PROAM02-0172 and -0177 significantly reduced the number of metastases per mouse. (Mean number of metastases per mouse cells, one-way ANOVA). \* p<0.05)

B) The effect of the LMW-compounds on the formation of breast cancer metastasis *in vivo*. Human breast cancer cells MDA-MB-231luc were injected in the left cardiac ventricle and treated daily by intraperitoneal injection. The number of skeletal metastasis was scored.

\*\* P<0.01, (Mean +/- SEM, two-way ANOVA)

A

Experimental prostate cancer metastasis  
PC-3M-Pro4lucA6

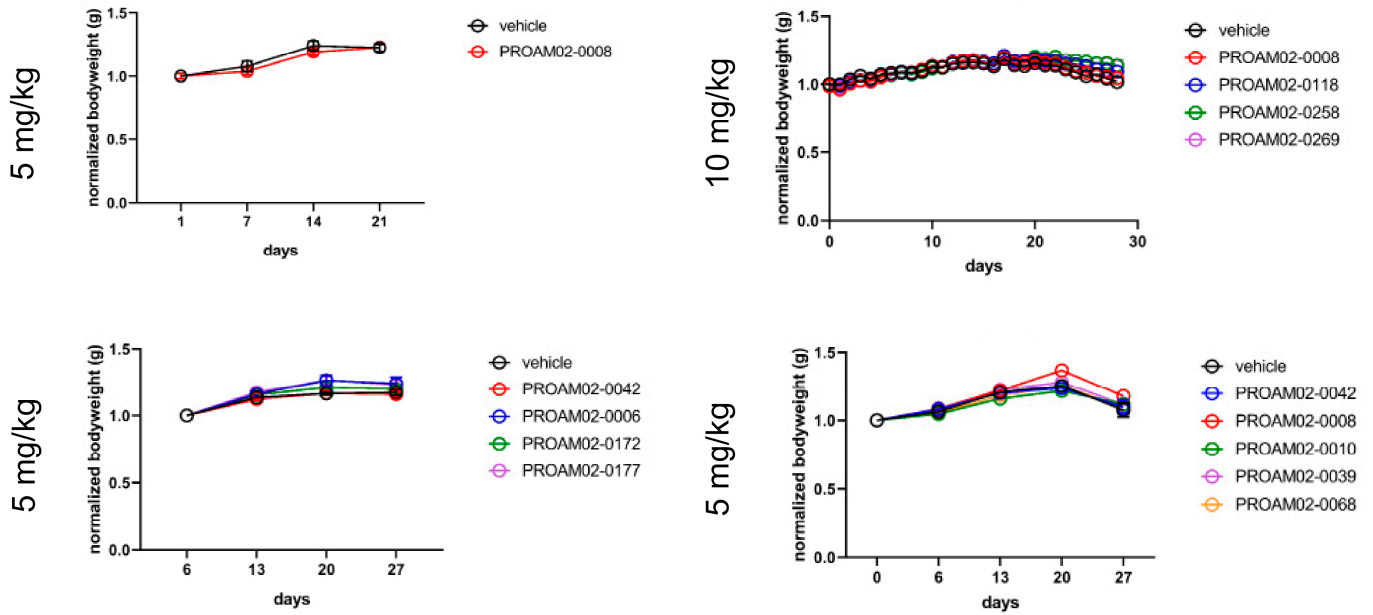

B

Experimental breast cancer metastasis  
MDA-MB-231luc

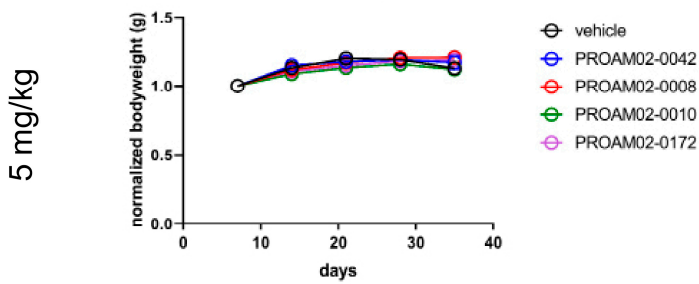

**Figure S5: LMW-compound administration does not affect bodyweight**

Mice were treated with 5 or 10 mg/kg LMW-compound by daily peritoneal administration. No significant changes in bodyweights were observed.

(Mean +/- SEM, two-way ANOVA)
